# Supplementary material for: Origin and evolution of GATA2a and GATA2b in teleosts: insights from tongue sole, Cynoglossus semilaevis
Source: PeerJ. 2016 Mar 21;4:e1790. doi: 10.7717/peerj.1790 (PMC4806627; doi:10.7717/peerj.1790)
Supplement: Figure S1 [file peerj-04-1790-s001.pdf]

|          |                                                                                                                                 |     |
|----------|---------------------------------------------------------------------------------------------------------------------------------|-----|
| CsGATA2a | MDVTHDQ...PRWMHH...AVLN..GQHPDSDHHPGLGGINMYEPTTQILLPPEDEVIVFNHLDSCQNPYYHNSARARVSYOAH...ARLTGTQVCRPHLIHSPGISWLDGKATLSAHHHHHHNA   | 114 |
| PoGATA2a | MDVTHDQ...PRWMHHH...AVLN..GQHPDSDHHPGLGGINMYEPTAQLLPPEDEVIVFNHLDSCQNPYYHNSARARVSYOAH...ARLTGSCVCRPHLIHSPGISWLDGKAAALSAH...HHNA  | 111 |
| OlGATA2a | MDVAADQ...PRLIHHH...PVLNHGQHPDSDHHPGLGGINMYEPAQILLPPEDEVIVFNHLDSCQNPYYHNSARARVSYOAH...ARLTGTQVCRPHLIHSPGISWLDGKAAALSAH...HHNA   | 112 |
| TrGATA2a | MDVAAEQ...PRWMHHH...AMLN..GQHPDSDHHPGLGGINMYEPTAQLLPPEDEVIVFNHLDSCQNPYYHNSARARVSYOAH...ARLTGTQVCRPHLIHSPGISWLDGKAAALSAH...HHNA  | 113 |
| TnGATA2a | MDVAADQ...PRWMHHH...AVLN..GQHPDSDHHPGLGGINMYEPTAQLLPPEDEVIVFNHLDSCQNPYYHNSARARMSYPAH...ARLACTGVCRPHLIHSPGISWLDGKAAALSAH...HHNA  | 111 |
| PfGATA2a | MDVAADQ...PRWMHHH...AMLN..GQHPDSDHHPGLGGINMYEPTTQILLPPEDEVIVFNHLDSCQNPYYHNSARARVSYOAH...ARLTGTQVCRPHLIHSPGISWLDGKAAALSAH...HHNA | 113 |
| OnGATA2a | MDVAADQ...HRWVHPH...AVLN..GQHPDSDHHPGLGGINMYEPTAQLLPPEDEVIVFNHLDSCQNPYYHNSARARVSYOAH...ARLTGTQVCRPHLIHSPGISWLDGKAPALSAH...HHNA  | 111 |
| CaGATA2a | MDVAADQ...PRWMHHH...AMLN..GQHPDSDHHPGLGGINMYEPTAQLLPPEDEVIVFNHLDSCQNPYYHNSARARVSYOAH...ARLTG...PHLIHSPGISWLDGKAAALSAHHH..HHNA   | 109 |
| TnGATA2b | NEVAAAD..QSRWMAHHHAVLN..GQHPDSDHHSLSINMYEEMAPILLQDEVIMFLNHLDSCQNPYYTN..SRARVTSYSAH...ARLTGNQVCRPHLIHSPGIPWLDPGKAAALSA...HHNA    | 113 |
| OlGATA2b | NEVAAAD..QSRWMAHHHAVLN..GQHPDSDHHSLSINMYEEMAPILLQDEVIMFLNHLDSCQNPYYTN..SRARVTSYSAH...ARLTGNQVCRPHLIHSPGIPWLDPGKAAALSA...HHNA    | 113 |
| OnGATA2b | NEVAAAD..QSRWMAHHHAVLN..GQHPDSDHHSLSINMYEEMAPILLQDEVIMFLNHLDSCQNPYYTN..SRARVTSYSAH...ARLTGNQVCRPHLIHSPGIPWLDPGKAAALSA...HHNA    | 113 |
| PoGATA2b | NEVAAAD..QSRWMAHHHAVLN..GQHPDSDHHSLSINMYEEMAPILLQDEVIMFLNHLDSCQNPYYTN..SRARVTSYSAH...ARLTGNQVCRPHLIHSPGIPWLDPGKAAALSA...HHNA    | 113 |
| CsGATA2b | NEVAAADQ..QSRWMAHHHAVLN..GQHPDSDHHSLSINMYEEMAPILLQDEVIMFLNHLDSCQNPYYTN..SRARVTSYSAH...ARLTGNQVCRPHLIHSPGIPWLDPGKAAALSA...HHNA   | 114 |
| PfGATA2b | NEVAAAD..QSRWMAHHHAVLN..GQHPDSDHHSLSINMYEEMAPILLQDEVIMFLNHLDSCQNPYYTN..SRARVTSYSAH...ARLTGNQVCRPHLIHSPGIPWLDPGKAAALSA...HHNA    | 113 |
| TrGATA2b | NEVAAAD..QSRWMAHHHAVLN..GQHPDSDHHSLSINMYEEMAPILLQDEVIMFLNHLDSCQNPYYTN..SRARVTSYSAH...ARLTGNQVCRPHLIHSPGIPWLDPGKAAALSA...HHNA    | 113 |
| CaGATA2b | NEVAAAD..QSRWMAHHHAVLN..GQHPDSDHHSLSINMYEEMAPILLQDEVIMFLNHLDSCQNPYYAN..SRARVTSYSAH...ARLTGNQ..GLANLIHSPGIPWLDPGKAAALSA...HHNA   | 112 |

|          |                                                                                                                        |     |
|----------|------------------------------------------------------------------------------------------------------------------------|-----|
| CsGATA2a | WAVSPFSKESLHPGASPGGLSAVPCSSNSNTVSAPSLTPPHSHSPHHLYTFPTTPPKDVSPDPGAASPSSSSVSRMDEKES...IKYQMSLTGMMKMGSSPLRSSIA...SMSAQ.   | 227 |
| PoGATA2a | WAVSPFSKESLMHFGASPGGLSAVPCSSNSNTVSAPSLTPPHSHSP...HLAYFPPTPKDVSPDPGAASP...LSATRMDEKDS...IKYQVSLAGMKMGSSPLRSSIA...SMSAQ. | 221 |
| OlGATA2a | WAVSPFSKESLHPGASPGALSAVPCNHSNSAVSATLTPPHSPSS...HLAYFPPTPKDVSPDPGAASP...CSPTVMDEKDS...IKYQMP...ESMKMGSSPLRSSIA...SMSAQ. | 221 |
| TrGATA2a | WAVSPFSKESLHPGASPGGLSAVPCSSNSNTVSASSLPPSHSP...HLAYFPPTPKDVSPDPGAASP...PATRMDEKES...MKYQVSLTGMMKMGSSPLRTSLIA...SMSAQ.   | 222 |
| TnGATA2a | WAVSPFSKESLHPGASPGALSAVPCSSNSNTVSASSLPPSHSP...HLAYFPPTPKDVSPDPGAASS...PAARLDEKES...MKYQVSLTGMMKMGSSPLRSSIA...PWGAQ.    | 220 |
| PfGATA2a | WAVSPFSKESLHPGASPGALSAVPCSSNSNAATASLTPPHQNTS...HLYTFPTTPPKDVSPDPGAISPSSAAAAAARDEKES...IKYQLSLDGMKMGSSPLRSSIA...SMSAQ.  | 225 |
| OnGATA2a | WAVSPFSKESLHPGASPGALSAVPCSSNSNTVASSLTPPHSGT...HLYTFPTTPPKDVSPDPGAASP...SSTTIDEKES...IKYQVSLPGMKMGSSPLRSSIA...SNNQA.    | 221 |
| CaGATA2a | WVSPFSKESLHPGASPGGLSAVPCSSGNAASASLTPSHSP...HLAYFPPTPKDVSPDPGAASP...SAAARDEKES...IKYHVSITGEMKMGSSPLRSSIA...SMSAQ.       | 218 |
| TnGATA2b | WAVSHFSKCLGAGAGG...YPCSSSTGTAPVSSLTPAS..HSSPHLYSFPTTPPKDVSPDPGPTSP..TSTSTMDDKES...IKYQVPLTDGMKMGSSPLRSGIA...SNNSQ.     | 216 |
| OlGATA2b | WAVSHFSKCLGAPAGG...YPCSSNTGTAVSSLTPAS..HSSPHLYSFPTTPPKDVSPDPGPTSP..TSTSTMDEKES...IKYQVPLTDGMKMGSSPLRSGIA...SNNSQ.      | 214 |
| OnGATA2b | WAVSHFSKCLGAPAGG...YPCSSSTGTAPVSSLTPAS..HSSPHLYSFPTTPPKDVSPDPGPTSP..TSTSTMDEKES...IKYQVPLTDGMKMGSSPLRSGIA...SNNSQ.     | 216 |
| PoGATA2b | WAVSHFSKCLGPTGSG...YPCSSNTGTAPVSSLTPAS..HSSPHLYSFPTTPPKDVSPDPGPTSP..TSTSTM..DEKESIKS..YQVPLTDGMKMGSSPLRSGIA...SNN...S  | 215 |
| CsGATA2b | WAVSHFSKCLGPTGSG...YPCSSSTGTAPVSSLTPAS..HSSPHLYSFPTTPPKDVSPDPGPTSP..TSTSTMDEKESIKS..YQVPLTDGMKMGSSPLRSGIAAASASNNQ.     | 226 |
| PfGATA2b | WAVSHFSKCLGAPAGG...YPCSSSAGTAVSSLTPAS..HSSPHLYS...RMDKES...IKYQVPLTDGMKMGSSPLRSGIA...SNNQ.                             | 193 |
| TrGATA2b | WAVSHFSKESLGAAGG...YPCSSSTGTAPVSSLTPAS..HSSPHLYS...TSTSTMDDKES...IKYQVPLTDGMKMGSSPLRSGIA...SNNQ.                       | 216 |
| CaGATA2b | WAVSHFSKCLGAPAGG...YPCSSSTGTAPVSSLTVSH...SNAHLYSFPTTPPKDVSPDPGPTSP..TSSATRMDEKES...IKYQVPLTDGMKMGSSPLRSGIA...SNNQ.     | 214 |

## N-zinc finger motif

|          |                                                                                                                            |     |
|----------|----------------------------------------------------------------------------------------------------------------------------|-----|
| CsGATA2a | TPSTTHRIPTPYTLPEAAHEYGGSLLFHPGSLLAGSS..SHPNKNKGARSCTEGRCBVCNGATSTPLWRSDIGHYLCA..GLYHKMGQNRPLIKPKRRLSAARRAGTCANCQTTITTL     | 347 |
| PoGATA2a | TPSTTHRIPTPYTLPEAAHEYGGSLLFHPGSLLAGSS..GMHKNKGARSCTEGRCBVCNGATSTPLWRSDIGHYLCA..GLYHKMGQNRPLIKPKRRLSAARRAGTCANCQTTITTL      | 341 |
| OlGATA2a | TPSTTHRIPTPYSPLEAAHEYGGSLLFHPGSLLAGSP..S...KNGKTRSCTEGRCBVCNGATSTPLWRSDIGHYLCA..GLYHKMGQNRPLIKPKRRLSAARRAGTCANCQTTITTL     | 339 |
| TrGATA2a | TPSTTHRIPTYATLPEAAHEYGGSLLFHPGSLLAGSP..GPHKNKGTRSCTEGRCBVCNGATSTPLWRSDIGHYLCA..GLYHKMGQNRPLIKPKRRLSAARRAGTCANCQTTITTL      | 342 |
| TnGATA2a | TPSTTHRIPTPYTLPEAAHEYGGSLLFHPGSLLAGSP..APHHKNKGTRSCTEGRCBVCNGATSTPLWRSDIGHYLCKR..GLYHKMGQNRPLIKPKRRLSAARRAGTCANCQTTITTL    | 340 |
| PfGATA2a | TPSTTHRIPTYAPSLPEAAHEYGGSLLFHPGSLLAGSP..GTHKNKSARSCTEGRCBVCNGATSTPLWRSDIGHYLCA..GLYHKMGQNRPLIKPKRRLSAARRAGTCANCQTTITTL     | 345 |
| OnGATA2a | TPSTTHRIPTPYSPLEAAHEYGGSLLFHPGSLLAGS..S..STPKCKSARSCTEGRCBVCNGATSTPLWRSDIGHYLCA..GLYHKMGQNRPLIKPKRRLSAARRAGTCANCQTTITTL    | 340 |
| CaGATA2a | TPSTTHRIATPYTLPEAAHEYGGSLLFHPGSLLAGS..GSSRNK.....EGRCBVCNGATSTPLWRSDIGHYLCA..GLYHKMGQNRPLIKPKRRLSAARRAGTCANCQTTITTL        | 331 |
| TnGATA2b | ASATTHRIPTYAPSLPEYHGYGSLLFHPGLLGATGSSSTPPCKSARSS..EGRCBVCNGATSTPLWRSDIGHYLCA..GLYHKMGQNRPLIKPKRRLSAARRAGTCANCQTTITTL       | 336 |
| OlGATA2b | APATTHRIPTYAPSLPTTFPEYHGYGSLLFHPGSLLAGSSSSSTPPCKSARSS..EGRCBVCNGATSTPLWRSDIGHYLCA..GLYHKMGQNRPLIKPKRRLSAARRAGTCANCQTTITTL  | 335 |
| OnGATA2b | APATTHRIPTYAPSLPTTFPEYHGYGSLLFHPGSLLAGSSSSSTPPCKSARSS..EGRCBVCNGATSTPLWRSDIGHYLCA..GLYHKMGQNRPLIKPKRRLSAARRAGTCANCQTTITTL  | 337 |
| PoGATA2b | SOATTHRIPTYAPSLPTTFPEYHGYGSLLFHPGSLLAGSS...STPPCKSARSS..EGRCBVCNGATSTPLWRSDIGHYLCA..GLYHKMGQNRPLIKPKRRLSAARRAGTCANCQTTITTL | 334 |
| CsGATA2b | AAATTHRIPTYAPSLPHAFHGYGSLLFHPGSLLAGSSSSSTPPCKSARSS..EGRCBVCNGATSTPLWRSDIGHYLCA..GLYHKMGQNRPLIKPKRRLSAARRAGTCANCQTTITTL     | 347 |
| PfGATA2b | AAATTHRIPTYAPSLPTTFPEYHGYGSLLFHPGSLLAGSSSSSTPPCKSARSS..EGRCBVCNGATSTPLWRSDIGHYLCA..GLYHKMGQNRPLIKPKRRLSAARRAGTCANCQTTITTL  | 314 |
| TrGATA2b | ASATTHRIPTYAPSLPEYHGYGSLLFHPGSLLAGSSSSSTPPCKSARST..EGRCBVCNGATSTPLWRSDIGHYLCA..GLYHKMGQNRPLIKPKRRLSAARRAGTCANCQTTITTL      | 336 |
| CaGATA2b | GPTTHRIPTPYPSLHAFPEYHGYGSLLFHPGSLLAGSSSSSTPPCKSARSS..EGRCBVCNGATSTPLWRSDIGHYLCA..GLYHKMGQNRPLIKPKRRLSAARRAGTCANCQTTITTL    | 335 |

## C-zinc finger motif

|          |                                                                                                                           |     |
|----------|---------------------------------------------------------------------------------------------------------------------------|-----|
| CsGATA2a | WRRNANGDVCNA..GLIYFKLHNVRPLTMKKKGIQTRNRKMSKSKRNGCGSYEES.....PESAA..SLAGHS..MGLHPFTSHAG..HMLPTPTPIHPSFGHPHNSNMVTAMG..      | 442 |
| PoGATA2a | WRRNANGDVCNA..GLIYFKLHNVRPLTMKKKGIQTRNRKMSKSKRNGCGSYEETPCLCHDITSEFSA..SLAGHS..MGLHPFTSHAG..HMLPTPTPIHPSFGHPHNSNMVTAMG..   | 457 |
| OlGATA2a | WRRNASDVCNA..GLIYFKLHNVRPLTMKKKGIQTRNRKMSKSKRNGCGSYEETPSKLHDKITSEFSA..SLAGHS..MGLHPFTSHAG..HMLPTPTPIHPSFGHPHNSNMVTAMG..   | 457 |
| TrGATA2a | WRRNANGDVCNA..GLIYFKLHNVRPLTMKKKGIQTRNRKMSKSKRNGCGSYEETPKSLHDKITSEFSA..SLAGHS..MGLHPFTSHAG..HMLPTPTPIHPSFGHPHNSNMVTAMG..  | 458 |
| TnGATA2a | WRRNANGDVCNA..GLIYFKLHNVRPLTMKKKGIQTRNRKMSKSKRNGCGSYEETPKSLHDKITSEFSA..SLAGHS..MGLHPFTSHAG..HMLPTPTPIHPSFGHPHNSNMVTAMG..  | 456 |
| PfGATA2a | WRRNANGDVCNA..GLIYFKLHNVRPLTMKKKGIQTRNRKMSKSKRNGCGSYEETPKSLHDKITSEFSA..SLAGHT..MGLHPFTSHAGTHMLPTPTPIHPSFGHPHNSNMVTAMG..   | 462 |
| OnGATA2a | WRRNAHGDVCNA..GLIYFKLHNVRPLTMKKKGIQTRNRKMSKSKRNGCGSYEETPKSLHDKITSEFSA..SAG..HMF..MGLHPFTSHAGTHMLPTPTPIHPSFGHPHNSNMVTAMG.. | 445 |
| CaGATA2a | WRRNANGDVCNA..GLIYFKLHNVRPLTMKKKGIQTRNRKMSKSKRNGCGSYEETPKSLHDKITSEFSA..SLAGHT..MGLHPFTSHAGTHMLPTPTPIHPSFGHPHNSNMVTAMG..   | 445 |
| TnGATA2b | WRRNANGDVCNA..GLIYFKLHNVRPLTMKKKGIQTRNRKMSKSKRNGCGSFDLSKCMODKASFCGAPGTSIHTHGMGLPFTSSG..HMLPTPTPIHPSFGHPHNSRSPVWAEF        | 456 |
| OlGATA2b | WRRNANGDVCNA..GLIYFKLHNVRPLTMKKKGIQTRNRKMSKSKRNGKTCGFDLSKCMODKASFCGAPGTSIHTHGMGLPFTSSG..HMLPTPTPIHPSFGHPHNSRSPVWAEF       | 457 |
| OnGATA2b | WRRNANGDVCNA..GLIYFKLHNVRPLTMKKKGIQTRNRKMSKSKRNGKTCGFDLSKCMODKASFCGAPGTSIHTHGMGLPFTSSG..HMLPTPTPIHPSFGHPHNSRSPVWAEF       | 455 |
| PoGATA2b | WRRNANGDVCNA..GLIYFKLHNVRPLTMKKKGIQTRNRKMSKSKRNGKTCGFDLSKCMODKASFCGAPGTSIHTHGMGLPFTSSG..HMLPTPTPIHPSFGHPHNSRSPVWAEF       | 454 |
| CsGATA2b | WRRNANGDVCNA..GLIYFKLHNVRPLTMKKKGIQTRNRKMSKSKRNGKTCGFDLSKCMODKASFCGAPGTSIHTHGMGLPFTSSG..HMLPTPTPIHPSFGHPHNSRSPVWAEF       | 467 |
| PfGATA2b | WRRNANGDVCNA..GLIYFKLHNVRPLTMKKKGIQTRNRKMSKSKRNGKTCGFDLSKCMODKASFCGAPGTSIHTHGMGLPFTSSG..HMLPTPTPIHPSFGHPHNSRSPVWAEF       | 434 |
| TrGATA2b | WRRNANGDVCNA..GLIYFKLHNVRPLTMKKKGIQTRNRKMSKSKRNGKTCGFDLSKCMODKASFCGAPGTSIHTHGMGLPFTSSG..HMLPTPTPIHPSFGHPHNSRSPVWAEF       | 456 |
| CaGATA2b | WRRNANGDVCNA..GLIYFKLHNVRPLTMKKKGIQTRNRKMSKSKRNGKTCGFDLSKCMODKASFCGAPGTSIHTHGMGLPFTSSG..HMLPTPTPIHPSFGHPHNSRSPVWAEF       | 455 |
