# Supplementary material for: Origin and evolution of GATA2a and GATA2b in teleosts: insights from tongue sole, Cynoglossus semilaevis
Source: PeerJ journal article supplement (doi:10.7717/peerj.1790), 2016-03-21

**A**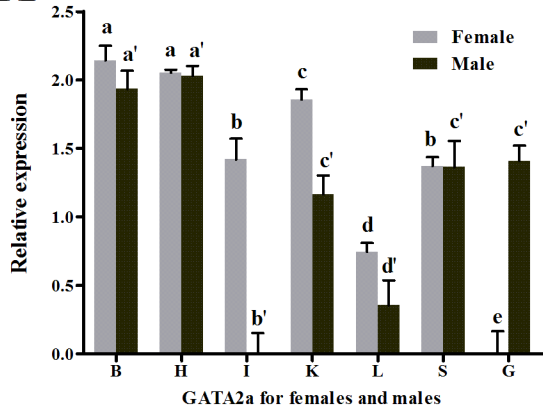**B**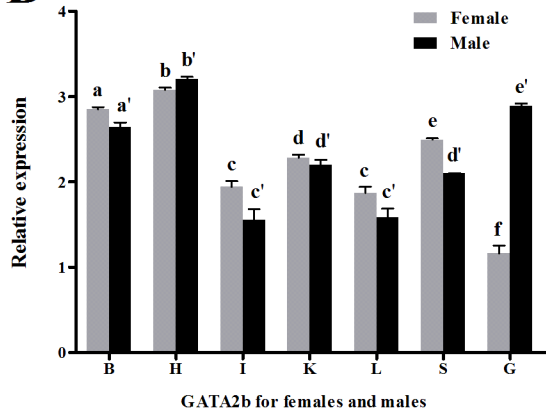

Supplement: Figure_S4.pdf [file Figure_S4.pdf]
